# Supplementary material for: A tool to operationalize dynamic LCA, including time differentiation on the complete background database
Source: Springer Nature journal article supplement (doi:10.1007/s11367-019-01696-6), 2019-11-05
Supplement: MOESM2 [file 17353404]

## Sheet: Sheet1
Spro e32 full name	Spro e31 full name	activity uuid	activityName	geography	start date	end date	ISIC number	ISIC class	specialActivityType	inheritence status	tags	group	product name	unit	APOS classification	T (process life span/time) in years	r in days	delta in days	alpha	beta	fixed calendar	tau (days)	continuous supply	market M	service S	obs	Column1	alpha test (number of commas per if function)	beta test (number of commas per if function)
1-propanol {RER}| production	1-propanol {RER}| production	22da00c1-c3b2-4ee1-b8ae-ac9e69b71aee	1-propanol production	RER	1998-01-01	2015-12-31	2011	Manufacture of basic chemicals	ordinary transforming activity		ConvertedDataset	ReferenceProduct	1-propanol	kg	not mft	50	1	60	1/50	1/50		delta				chemical factory infrastructure		0	0
Waste mineral oil {CH}| treatment of, hazardous waste incineration	Waste mineral oil {CH}| treatment of, hazardous waste incineration	9c017a2c-37fc-4a3b-b856-6748aabcb7e9	treatment of waste mineral oil, hazardous waste incineration	CH	1997-01-01	2015-12-31	3822	Treatment and disposal of hazardous waste	ordinary transforming activity		ConvertedDataset//Treatment	ReferenceProduct	waste mineral oil	kg	mft	30	1	30	1/30	1/30		delta			S	no distinction		0	0
Maintenance, barge {RER}| processing	Maintenance, barge {RER}| processing	1dfed578-ca20-4b8a-9576-1f2d59f436d9	maintenance, barge	RER	1990-01-01	2015-12-31	3315	Repair of transport equipment, except motor vehicles	ordinary transforming activity		ConvertedDataset	ReferenceProduct	maintenance, barge	unit	not mft	20	1	0	1/20	1/20		365.242			S	0		0	0
Machine operation, diesel, >= 74.57, underground mining {GLO}| machine operation, diesel, >= 74.57 kW, underground mining	Machine operation, diesel, >= 74.57, underground mining {GLO}| machine operation, diesel, >= 74.57 kW, underground mining	d10d67f6-6786-4ea8-92d7-7fc71b4da690	machine operation, diesel, >= 74.57 kW, underground mining	GLO	2014-01-01	2015-12-31	3510a	Electric power generation based on liquid fuels	ordinary transforming activity		template dataset	ReferenceProduct	machine operation, diesel, >= 74.57, underground mining	hour	not mft	20	1/24	0	1/20	1/20		r_p	x			0		0	0
Electricity, high voltage {AT}| electricity production, wind, >3MW turbine, onshore	Electricity, high voltage {AT}| electricity production, wind, >3MW turbine, onshore	fc286375-eb5f-4571-8f71-f03c2e200e77	electricity production, wind, >3MW turbine, onshore	AT	2012-01-01	2015-12-31	3510	Electric power generation, transmission and distribution	ordinary transforming activity	child	wind power	ReferenceProduct	electricity, high voltage	kWh	not mft	25	1/24/60	0	1/25	1/25		r_p	x			0		0	0
Potato {US}| production	Potato {US}| production	f98ea701-8633-4d44-bb28-17cc39788bd5	potato production	US	2001-01-01	2015-12-31	0113	Growing of vegetables and melons, roots and tubers	ordinary transforming activity			ReferenceProduct	potato	kg	not mft	1	365.242	0	x := t - trunc(t) ; if(x<7/12, 0, if(x<10/12, 4,0))	1	Planting in March to April, harvest in July to September	r_p				41.0 tonnes/ha;Planting in March to April, harvest in July to September;The yield is 41001 kg/ha at a moisture content at storage of 78%. 5 months between planting and harvest assumed	N	0	0
Pulpwood, hardwood, measured as solid wood under bark {RoW}| hardwood forestry, beech, sustainable forest management	Pulpwood, hardwood, measured as solid wood under bark {RoW}| hardwood forestry, beech, sustainable forest management	a7a1ae75-224f-407a-8f84-e73f6f95ee15	hardwood forestry, beech, sustainable forest management	RoW	2010-01-01	2015-12-31	0220	Logging	ordinary transforming activity		combined production	ReferenceProduct	pulpwood, hardwood, measured as solid wood under bark	m3	not mft	140	365.242*140	0	1/140	1/140		r_c				822 m3/ha;Rotation period 140 years; Per rotation period 822 solid under bark (sub) m3/ha ( 192 m3/ha from thinnings and 630 m3/ha from final harvest) assumed 2 thinnings at 60 and 100 years		0	0
Cattle for slaughtering, live weight {CA-QC}| milk production, from cow	Cattle for slaughtering, live weight {CA-QC}| milk production, from cow	f2e39310-bf1c-4aa2-901e-471f2d9d697a	milk production, from cow	CA-QC	2009-01-01	2015-12-31	0141	Raising of cattle and buffaloes	ordinary transforming activity			ReferenceProduct	cattle for slaughtering, live weight	kg	not mft	10	10*365.242	0	1/10	1/10		r_c				assumed lproduction life of 5		0	0
Green bell pepper {GLO}| production	Green bell pepper {GLO}| production	b8409d65-a7b6-4af7-a625-8df20400cb31	green bell pepper production	GLO	2010-01-01	2015-12-31	0113	Growing of vegetables and melons, roots and tubers	ordinary transforming activity			ReferenceProduct	green bell pepper	kg	not mft	1	365.242/2	0	1	1		r_c				80 tonnes/ha;;Yield: 80 t / ha. Duration of one cropping cycle: 6 months. Greenhouse production.	N	0	0
Citrus {GLO}| production	Citrus {GLO}| production	0282f57e-6d31-4adb-83ca-ff8dc3423d69	citrus production	GLO	2010-01-01	2015-12-31	0123	Growing of citrus fruits	ordinary transforming activity			ReferenceProduct	citrus	kg	not mft	20	365.242/2	0	1/20	1/20		r_p				35 tonnes/ha &r;;This dataset represents citrus (grapefruit, oranges, mandarine etc.) production. Yield: 35 t / ha. Duration of one cycle: 12 months in permanent culture. From th eweb: Field production. 2-3 harvest per year, lide span depending on the citrus tree 15-30 years. since both northern and southern hemispheres, we assume constant	G, considering 'oranges' and 'lemon and limes'	0	0
Transport, freight train {BE}| processing	Transport, freight train {BE}| processing	c302faf0-d9ca-4c04-9baa-b84d1018d042	transport, freight train	BE	2000-01-01	2015-12-31	4912	Freight rail transport	ordinary transforming activity			ReferenceProduct	transport, freight train	metric ton*km	not mft	40	0.063	0	1/40	1/40		r_c				(https://fr.wikipedia.org/wiki/Train_de_fret ; https://wehicles.com/wiki/Train_Marchandise) ==> max speed probably between 100 and 160 km/h ==> guess : average_speed=90 km/h. From Ecoinvent 2 report n°14, an average train is 1000 Gross tons and average load factor is 0.5 net tones per gross tons; distance of 135,89 km is obtained from EUrostat for 2011 on average for BE (http://ec.europa.eu/euros…		0	0
Transport, passenger car, large size, petrol, EURO 5 {RER}| transport, passenger car, large size, petrol, EURO 5	Transport, passenger car, large size, petrol, EURO 5 {RER}| transport, passenger car, large size, petrol, EURO 5	0fa30886-02cf-4409-ba74-2065d21c3670	transport, passenger car, large size, petrol, EURO 5	RER	2012-01-01	2015-12-31	4922	Other passenger land transport	ordinary transforming activity		internal combustion engine	ReferenceProduct	transport, passenger car, large size, petrol, EURO 5	km	not mft	10	1/24/60	0	1/10	1/10		r_c				Passenger car; average load=1.6; lifetime=150000km=240000pkm; demand factor=4.17*e-06 http://www.senat.fr/rap/r07-196/r07-19620.html ==> 15 y , https://www.google.com/url?q=http://www.securite-routiere.gouv.fr/content/download/29421/269997/file/observatoire%2Bvitesse%2B2011%2520&sa=U&ved=0CAQQFjAAahUKEwiu2p_2zbTHAhXCWCwKHW2MCeo&client=internal-uds-cse&usg=AFQjCNHpOpSUrhKkaRlNwisSYH99EWa-IA averag…		0	0
Transport, freight, lorry with refrigeration machine, 7.5-16 ton, EURO5, R134a refrigerant, cooling {GLO}| transport, freight, lorry with refrigeration machine, 7.5-16 ton, EURO5, R134a refrigerant, cooling		4884d251-7fff-47a7-868f-65bc85fa6658	transport, freight, lorry with refrigeration machine, 7.5-16 ton, EURO5, R134a refrigerant, cooling	GLO	2010-01-01	2015-12-31	4923	Freight transport by road	ordinary transforming activity			ReferenceProduct	transport, freight, lorry with refrigeration machine, 7.5-16 ton, EURO5, R134a refrigerant, cooling	metric ton*km	not mft	10	0.073	0	1/10	1/10		r_c				https://www.google.com/url?q=http://www.securite-routiere.gouv.fr/content/download/29421/269997/file/observatoire%2Bvitesse%2B2011%2520&sa=U&ved=0CAQQFjAAahUKEwiu2p_2zbTHAhXCWCwKHW2MCeo&client=internal-uds-cse&usg=AFQjCNHpOpSUrhKkaRlNwisSYH99EWa-IA; a speed of 72 km/h is assumed and distance of 126,15 km is obtained from EUrostat for 2016 on average for EU-28		0	0
Tempering, flat glass {GLO}| market for	Tempering, flat glass {GLO}| market for	57d5e8fb-ea25-4652-8467-1b24f45a9f59	market for tempering, flat glass	GLO	2011-01-01	2015-12-31	2310	Manufacture of glass and glass products	market activity		ConvertedDataset	ReferenceProduct	tempering, flat glass	kg	not mft									M		process that links a product to a market		0	0
Filter dust from Al electrolysis (waste treatment) {CH}| treatment of filter dust from Al electrolysis, residual material landfill																								M		obsolete		0	0
Gas turbine, 10MW electrical {RER}| construction	Gas turbine, 10MW electrical {RER}| construction	45eb7310-6dce-4780-9dd6-7a086b5f46ce	gas turbine construction, 10MW electrical	RER	1990-01-01	2015-12-31	4220a	Construction of utility projects for electricity production, except for liquid fuels	ordinary transforming activity		ConvertedDataset	ReferenceProduct	gas turbine, 10MW electrical	unit	not mft	1	365.242	30	x := t - trunc(t) ; if(x<1/4, 0, if(x<3/4, 2,0))	x := t - trunc(t) ; if(x<1/4, 0, if(x<3/4, 2,0))	t0_c – r_p - delta – (T_c)/2	T_c				hypothesis		0	0
Tram track {CH}| construction	Tram track {CH}| construction	f4f6f1ad-3964-4286-8ee5-d0fafa0534ae	tram track construction	CH	1990-01-01	2015-12-31	4210	Construction of roads and railways	ordinary transforming activity			ReferenceProduct	tram track	m*year	not mft	6	365.242*6	30	1/6	1/6	t0_c – r_p - delta – (T_c)/2	T_c				0		0	0
Waste electric and electronic equipment {GLO}| treatment of, shredding	Waste electric and electronic equipment {GLO}| treatment of, shredding	086966c9-326f-4a6d-9bec-e6c0aaf172a4	treatment of waste electric and electronic equipment, shredding	GLO	2005-01-01	2015-12-31	3830	Materials recovery	ordinary transforming activity		Treatment//ConvertedDataset	ReferenceProduct	waste electric and electronic equipment	kg	mft	30	1	30	1/30	1/30		delta			S	no distinction		0	0
Wind power plant, 800kW, moving parts {GLO}| construction	Wind power plant, 800kW, moving parts {GLO}| construction	5da10ac1-f64e-41ff-8047-ce1046c67304	wind power plant construction, 800kW, moving parts	GLO	1991-01-01	2015-12-31	4220a	Construction of utility projects for electricity production, except for liquid fuels	ordinary transforming activity		infrastructure//ConvertedDataset//wind power	ReferenceProduct	wind power plant, 800kW, moving parts	unit	not mft	1	365.242	30	1	1	t0_c – r_p - delta – (T_c)/2	T_c				0		0	0
